# Supplementary material for: Epidermal Growth Factor Receptor Inhibition Is Protective in Hyperoxia-Induced Lung Injury
Source: PubMed Central journal article supplement (PMC9526641; doi:10.1155/2022/9518592), 2022-09-20
Supplement: 9518592.f1.pdf [file 9518592.f1.pdf]

# S.1A

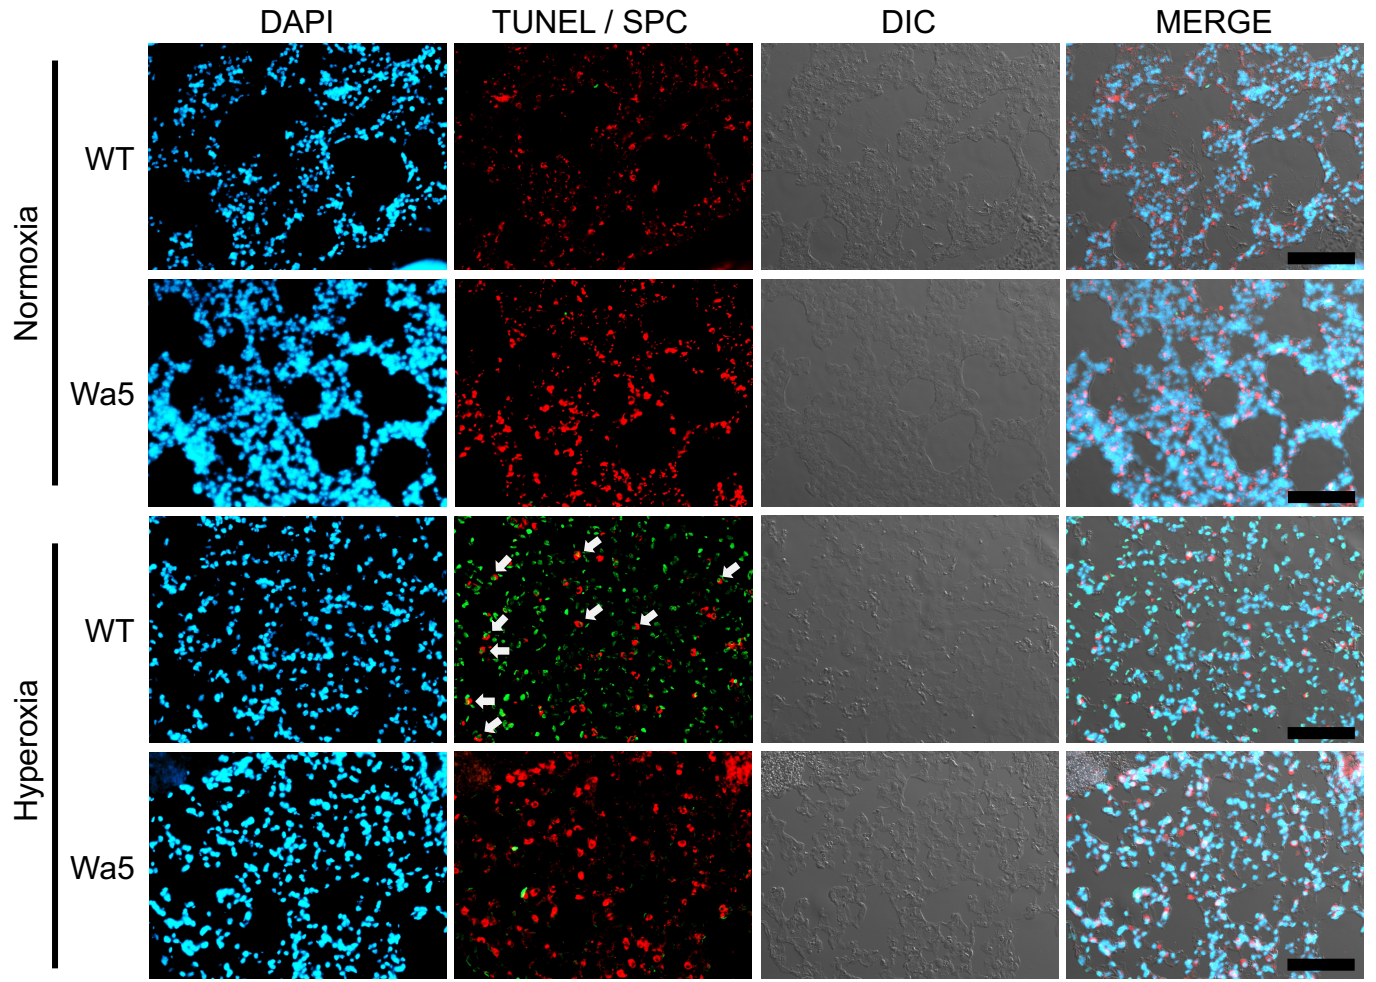

# S.2A

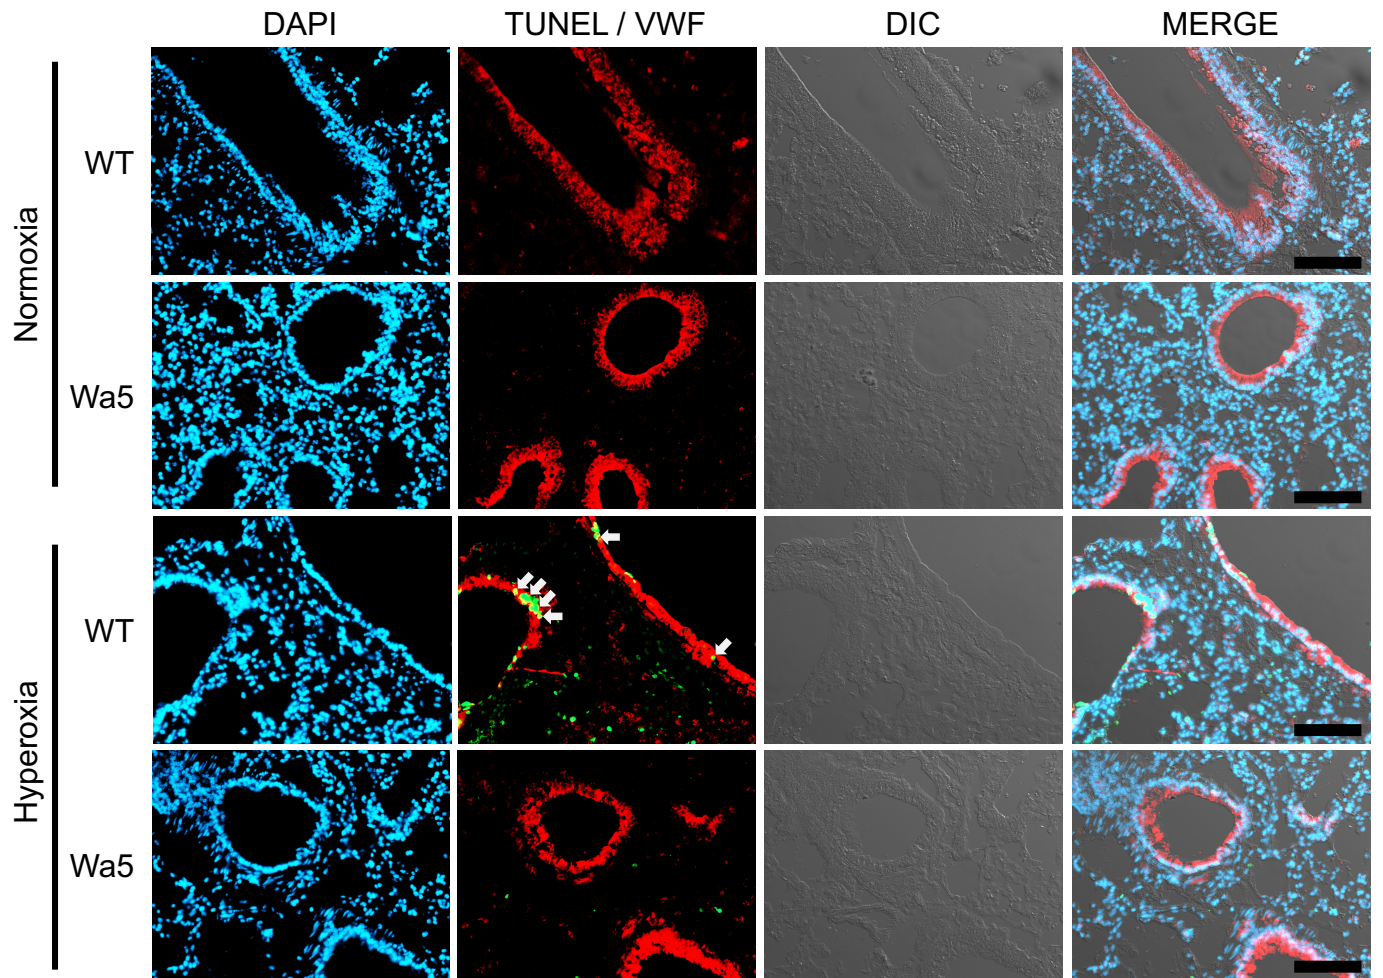

### S.3A

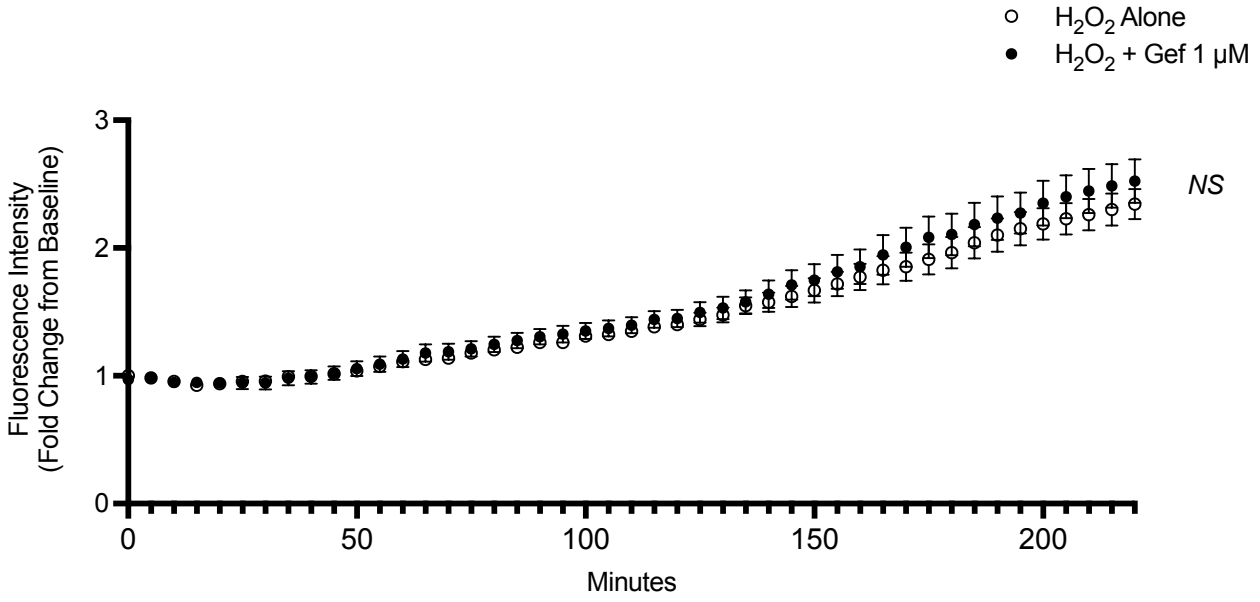

### S.3B

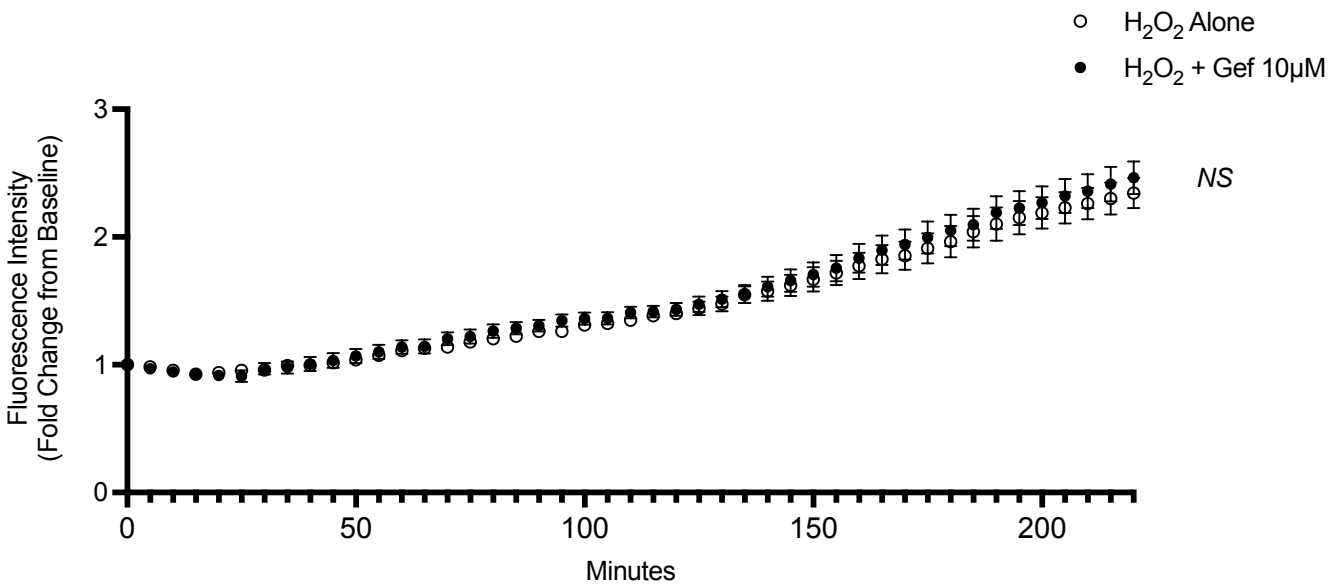

# S.4A

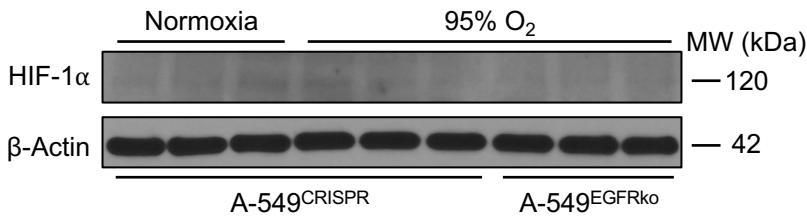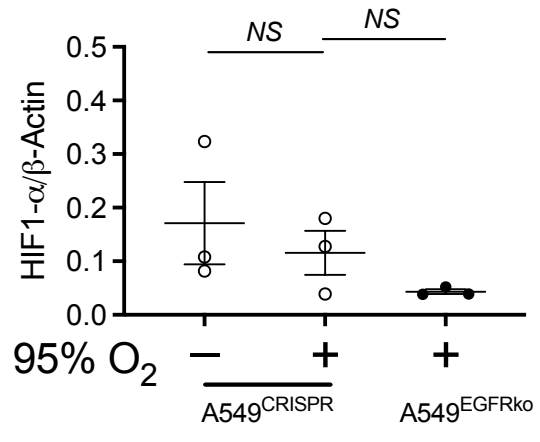

## **Western Blot Plates**

# WBs for Figure 3A

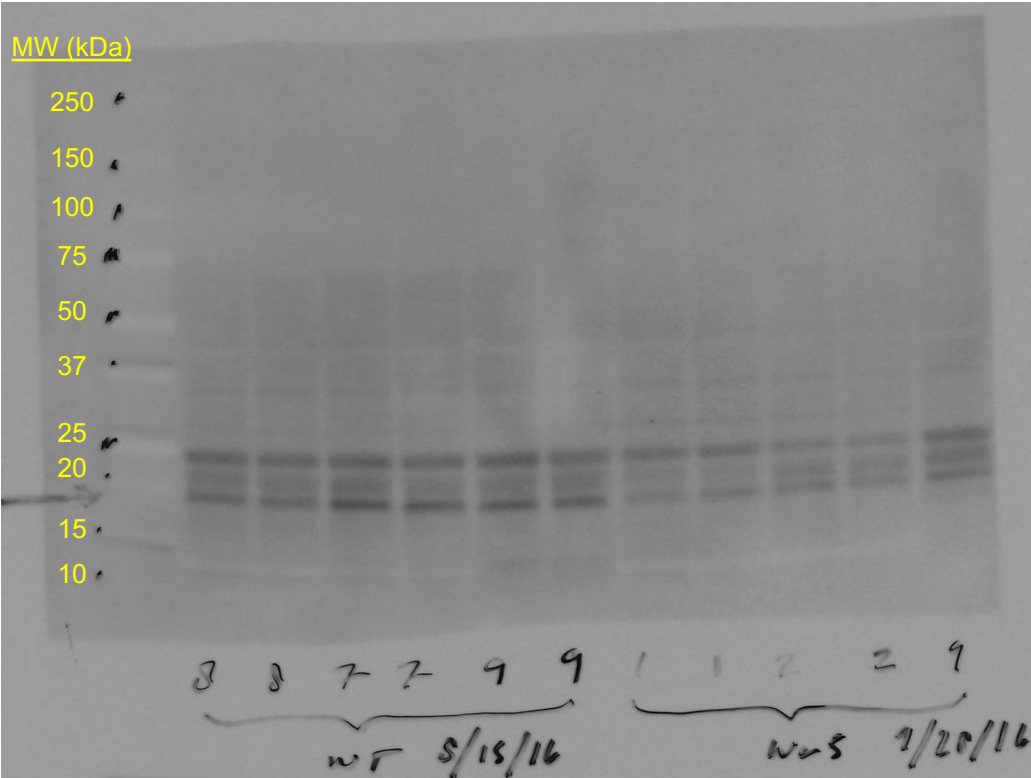

Cleaved caspase-3 (17, 19 kDa)

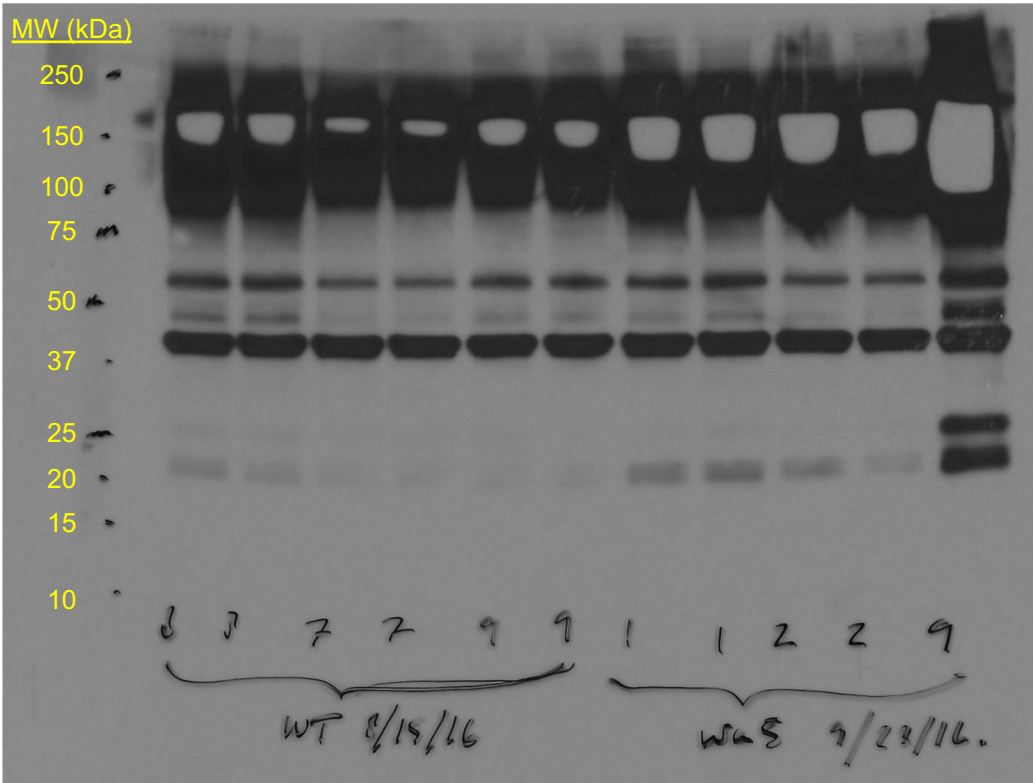

$\beta$ -Actin (42 kDa)

# WBs for Figure 3B

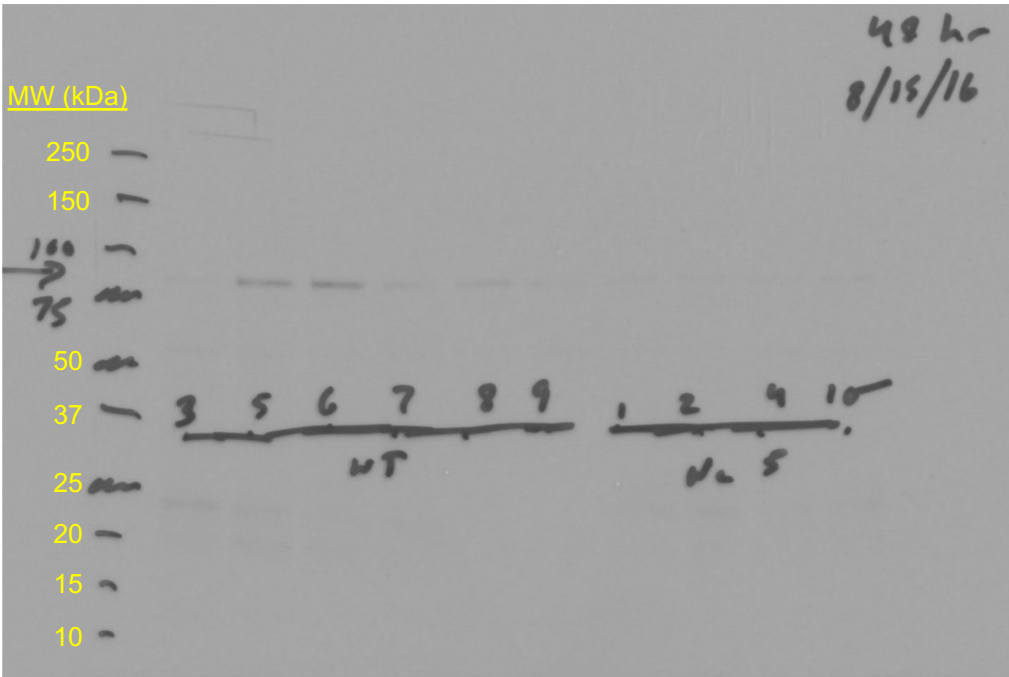

Cleaved PARP (89 kDa)

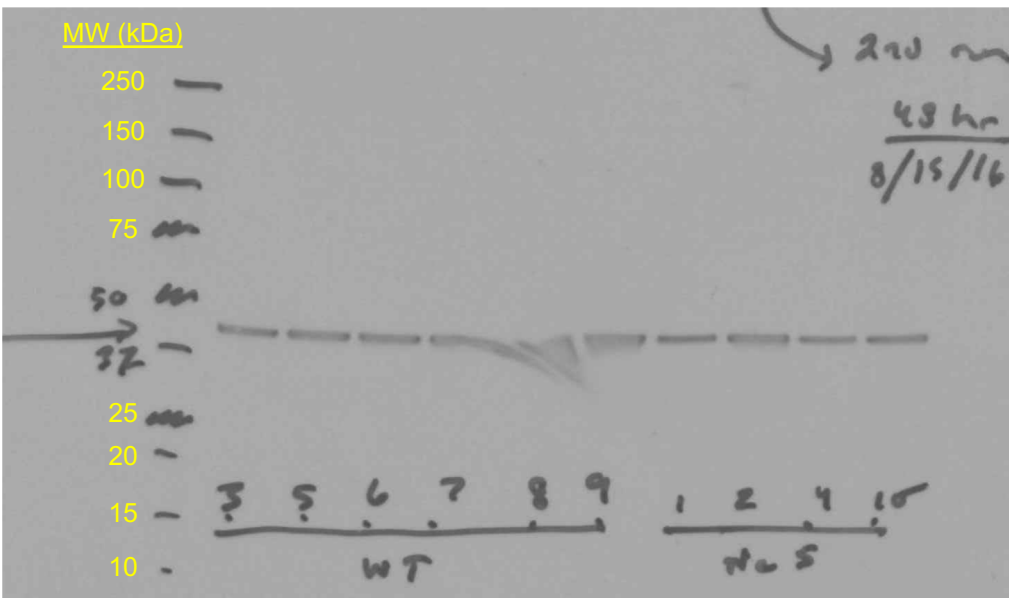

$\beta$ -Actin (42 kDa)

# WBs for Figure 4A

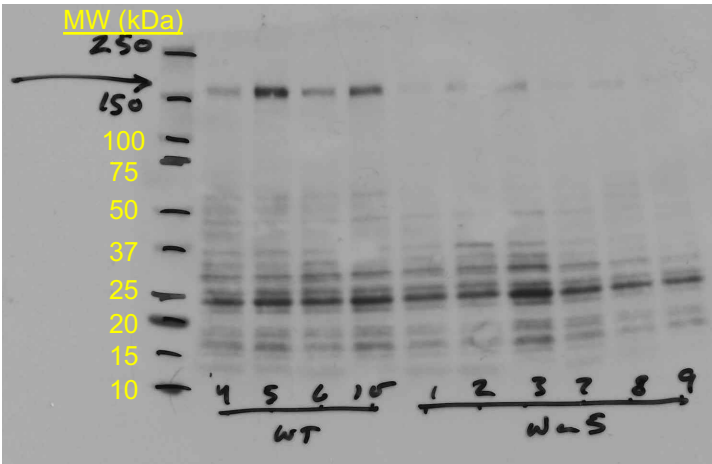

p-EGFR (175 kDa)

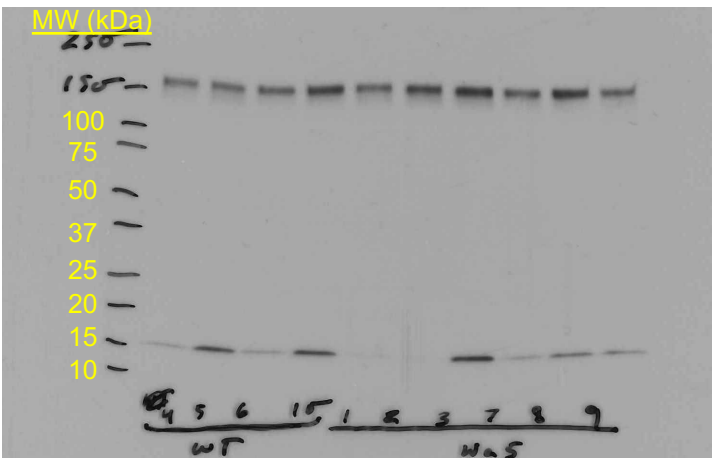

Total EGFR (175 kDa)

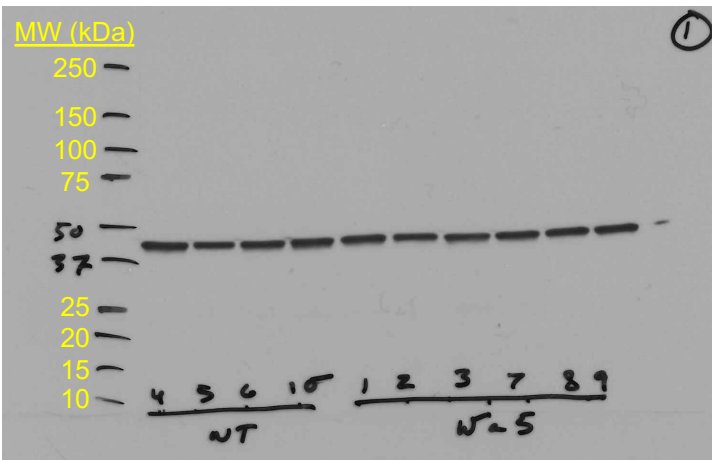

β-Actin (42 kDa)



## WBs for Figure 4B

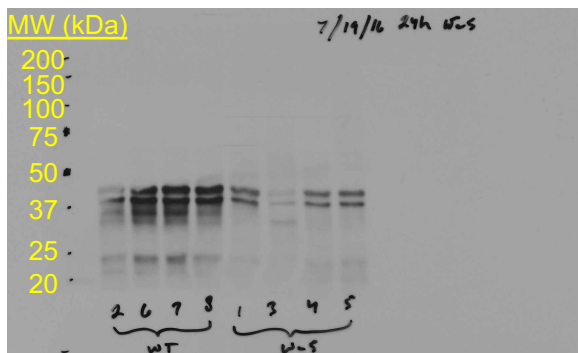

p-ERK1/2 (42, 44 kDa)

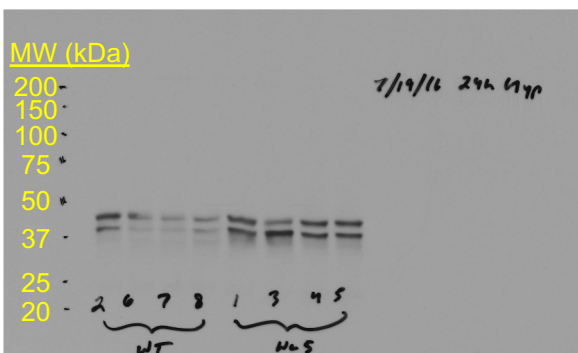

Total ERK1/2 (42, 44 kDa)

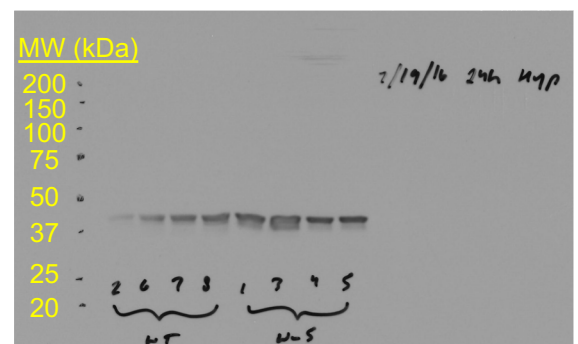

$\beta$ -Actin (42 kDa)

# WBs for Figure 4B (Not shown but included in densitometry)

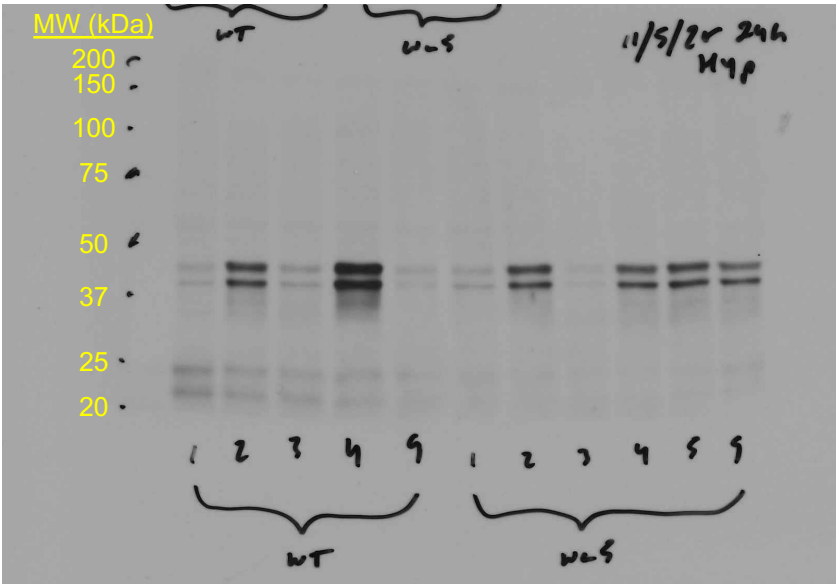

p-ERK1/2 (42, 44 kDa)

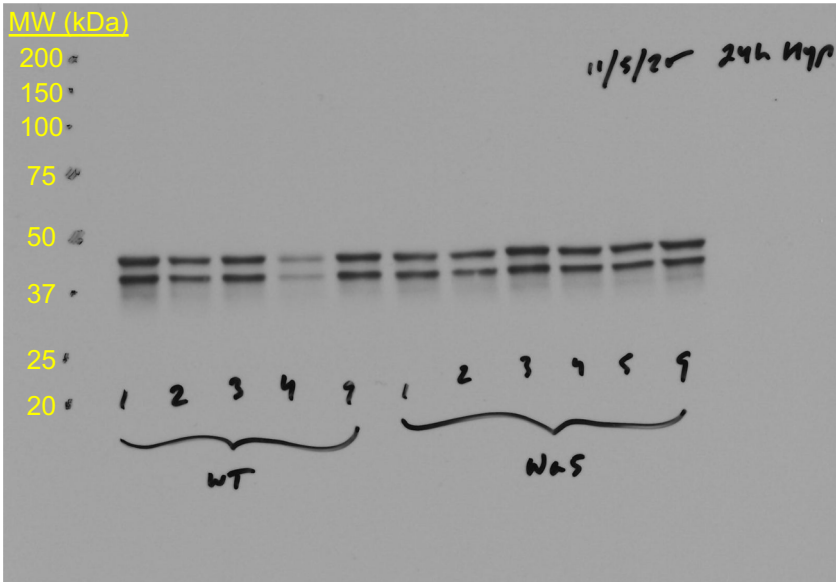

Total ERK1/2 (42, 44 kDa)

# WBs for Figure 4C

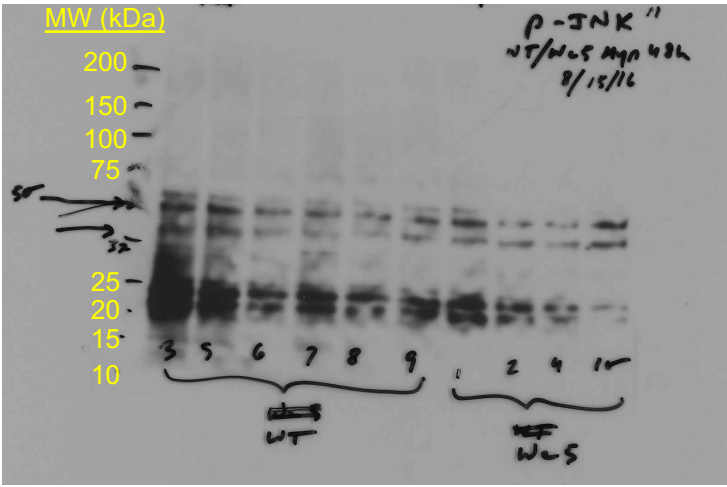

p-JNK1/2 (46, 54 kDa)

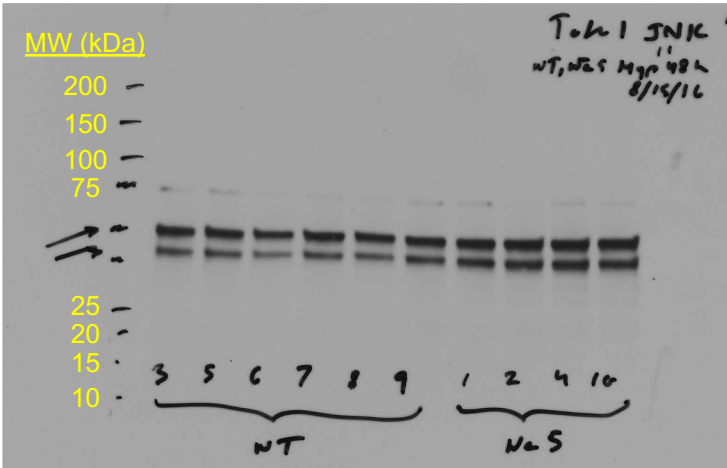

Total JNK1/2 (46, 54 kDa)

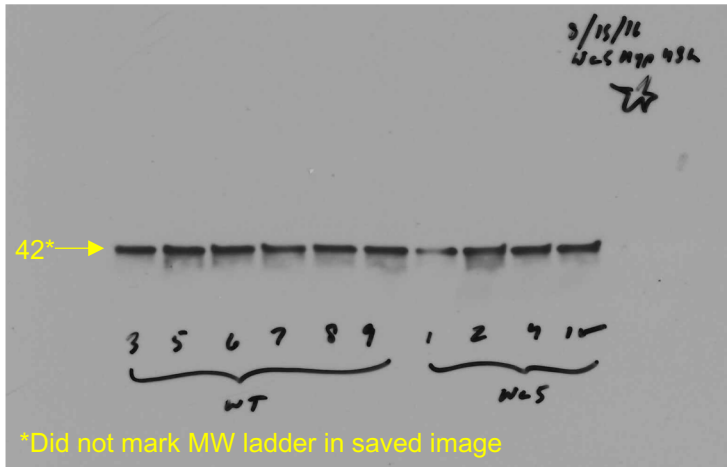

$\beta$ -Actin (42 kDa)

# WBs for Figure 4C

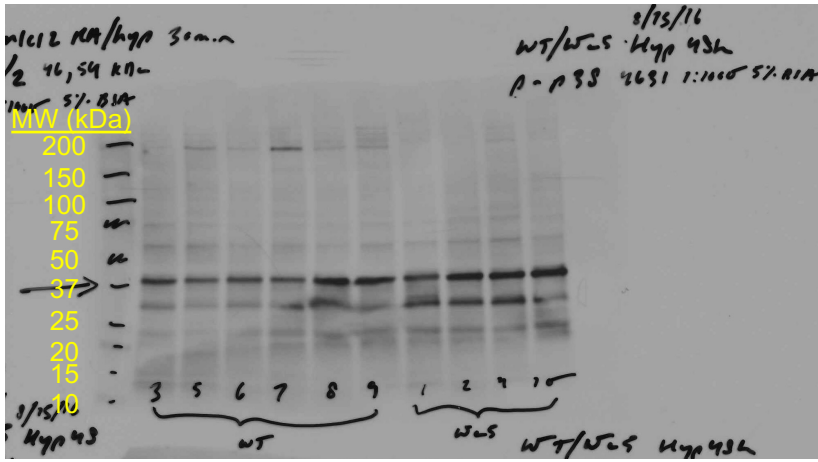

p-p38 (40 kDa)

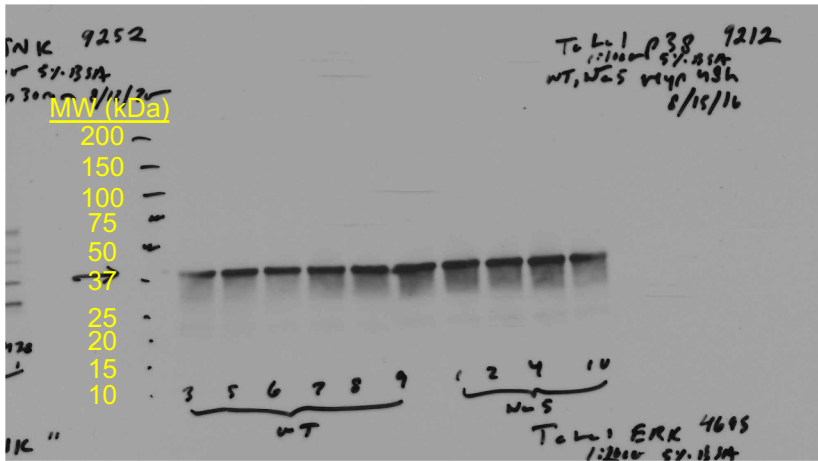

Total p38 (40 kDa)

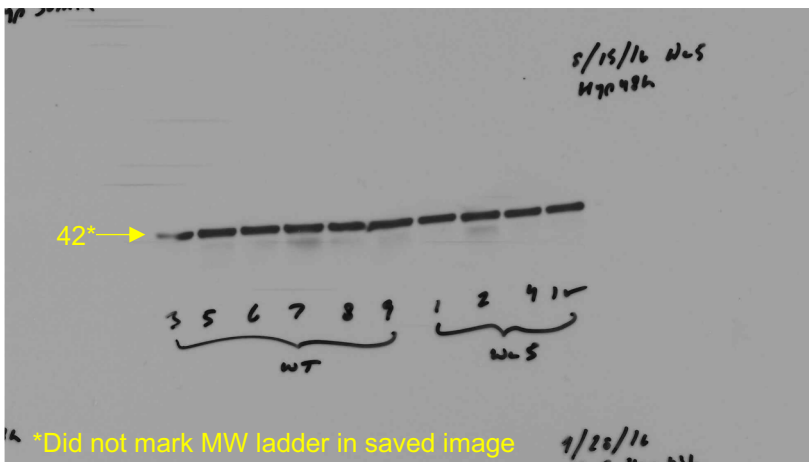

β-Actin (42 kDa)

# WBs for Figure 4D

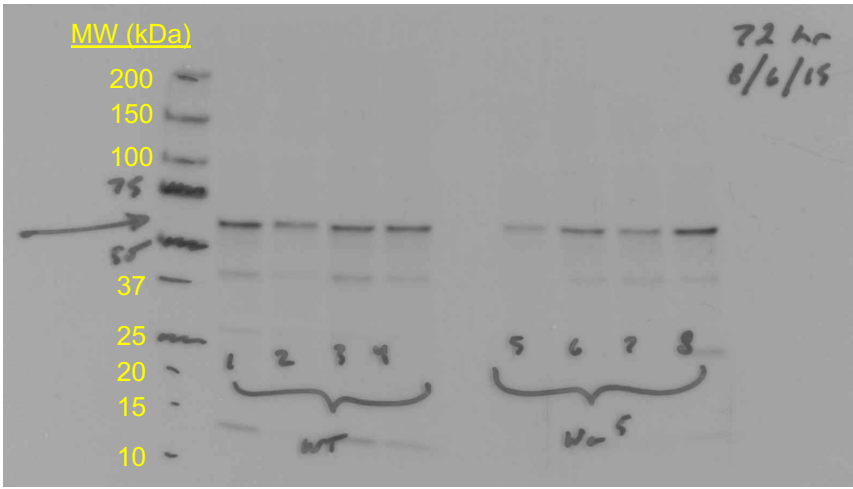

p-AKT (60 kDa)

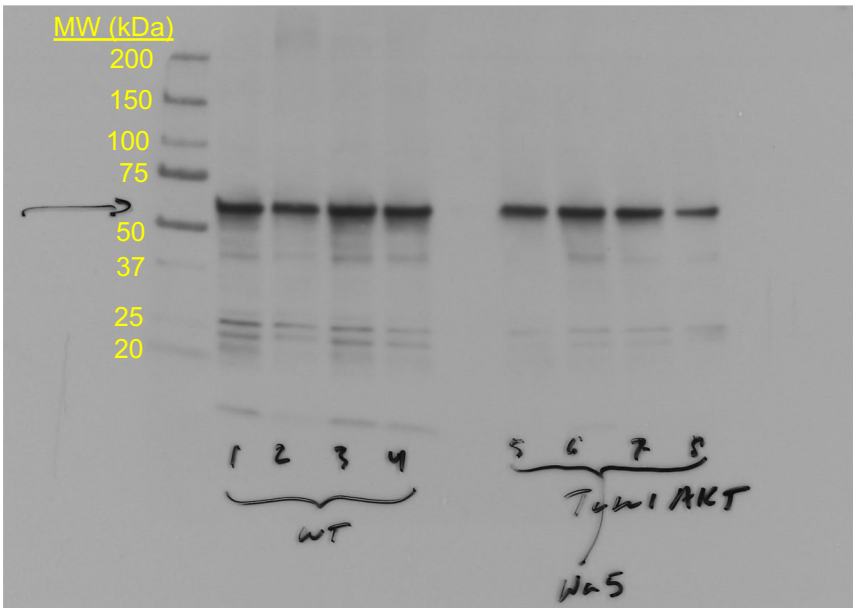

Total AKT (60 kDa)

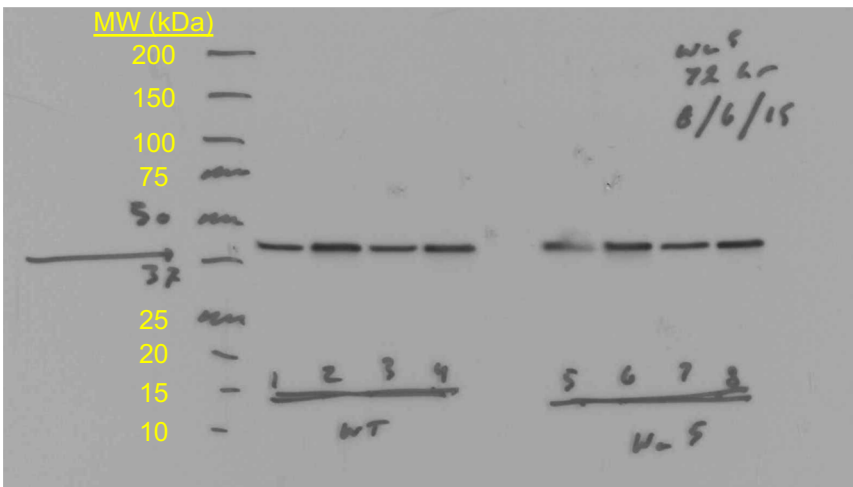

β-Actin (42 kDa)

# WBs for Figure 5A

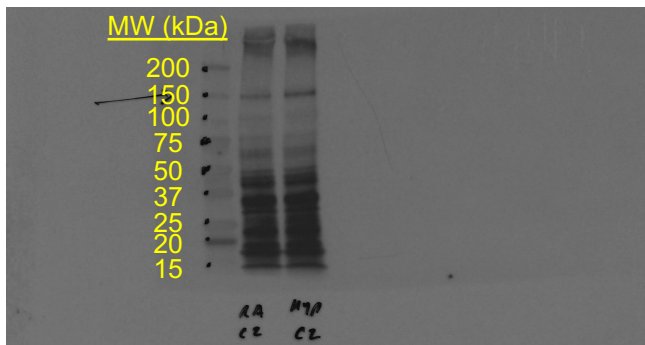

p-EGFR (175 kDa)

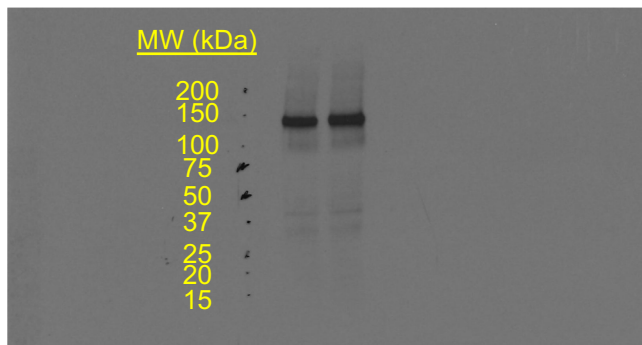

Total EGFR (175 kDa)

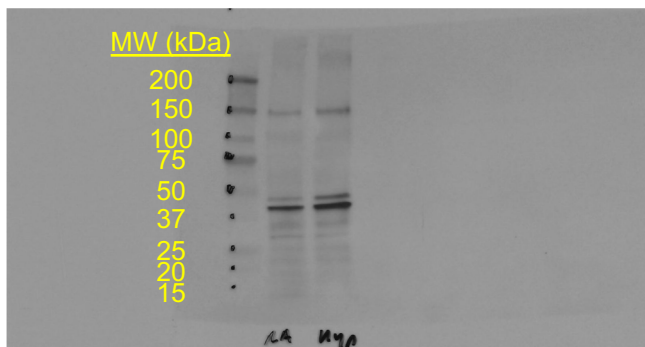

p-ERK1/2 (42, 44 kDa)

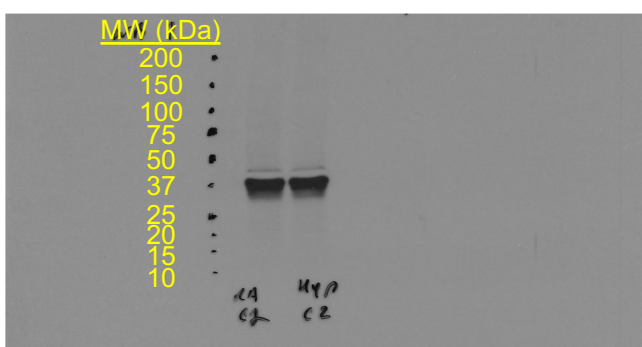

Total ERK1/2 (42, 44 kDa)

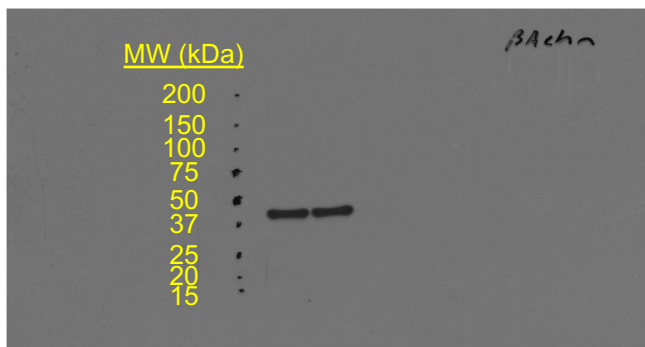

$\beta$ -Actin (42 kDa)

# WBs for Figure 5B

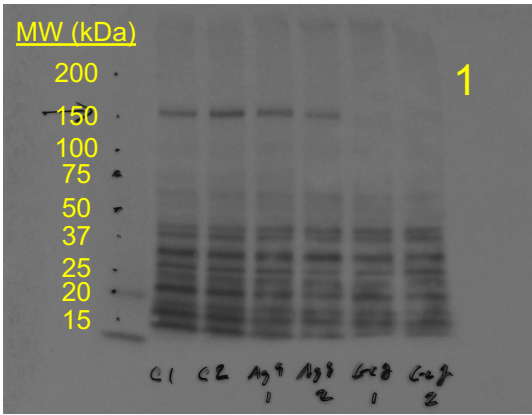

p-EGFR (175 kDa)

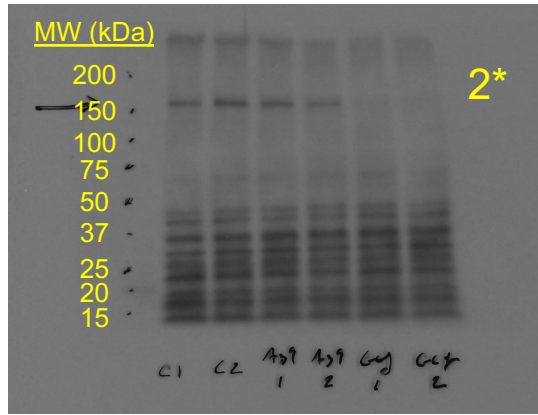

p-EGFR (175 kDa)

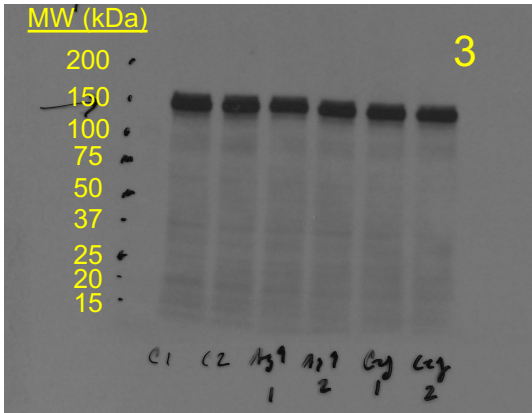

Total EGFR (175 kDa)

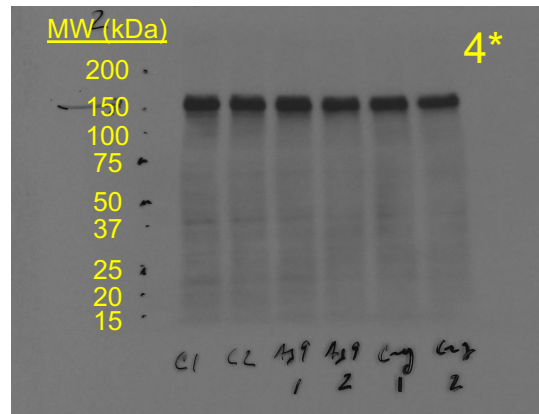

Total EGFR (175 kDa)

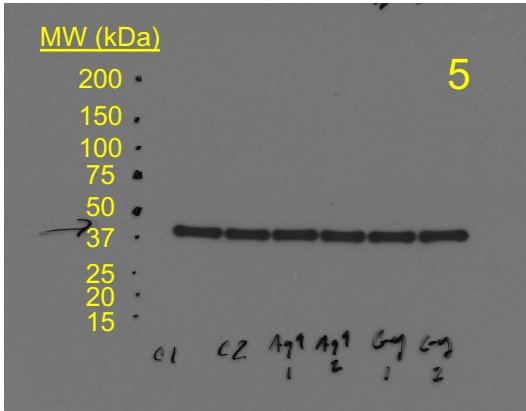

β-Actin (42 kDa)

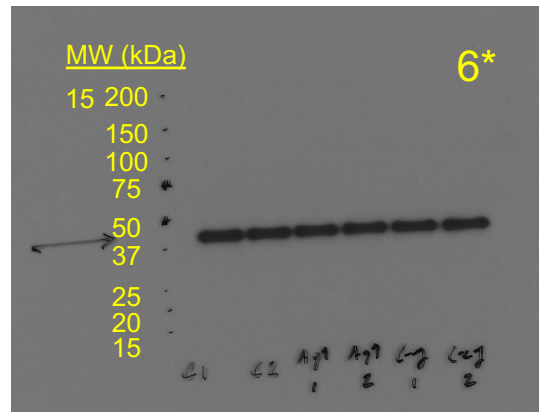

β-Actin (42 kDa)

\*WBs 2, 4, and 6 not shown but included in densitometry

# WBs for Figure 5C

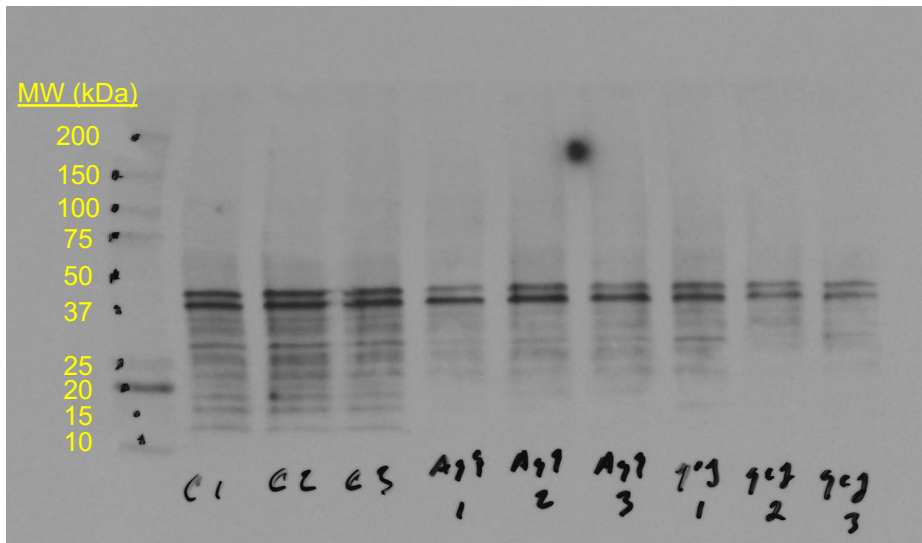

p-ERK1/2 (42, 44 kDa)

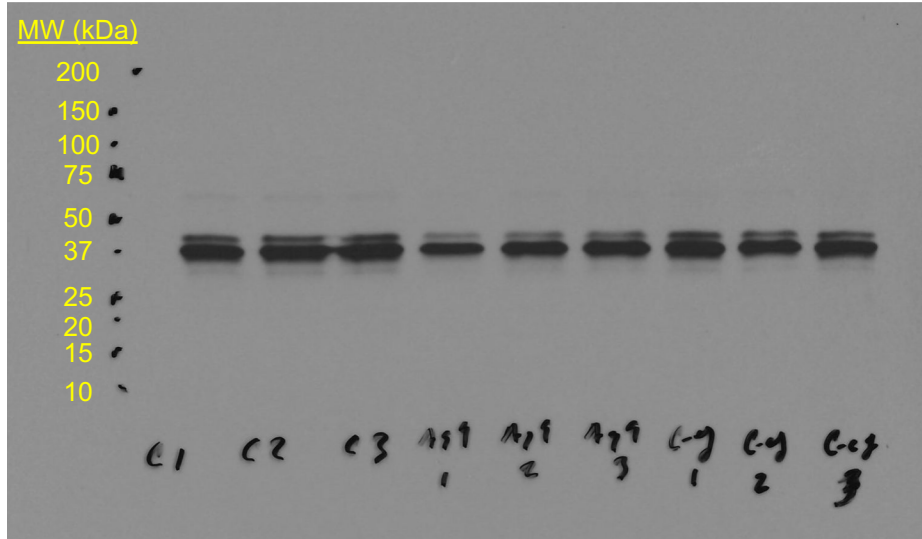

Total ERK1/2 (42, 44 kDa)

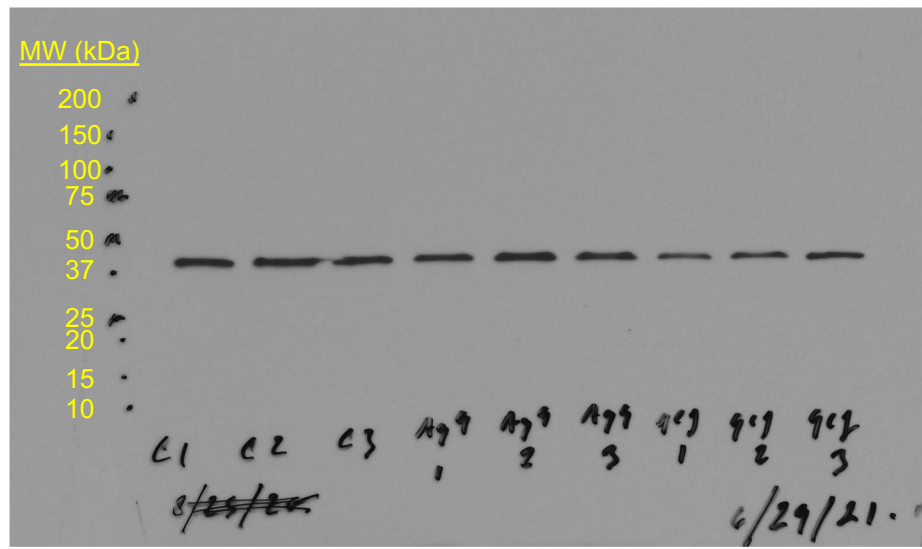

$\beta$ -Actin (42 kDa)



# WBs for Figure 6B

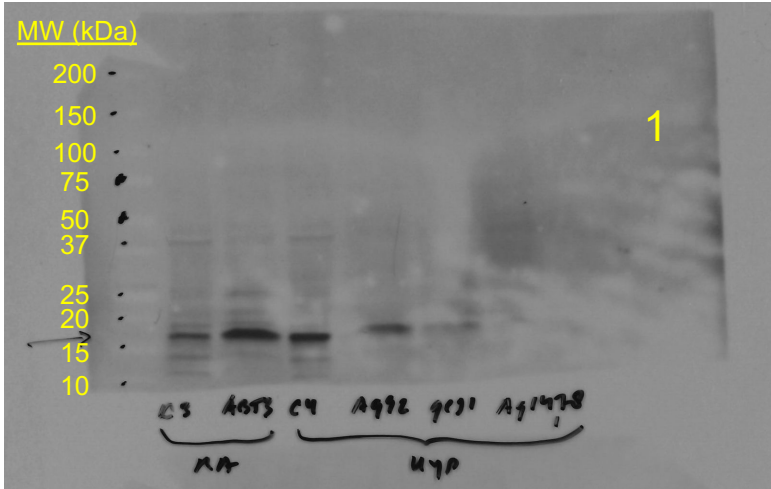

Cleaved caspase-3 (17, 19 kDa)

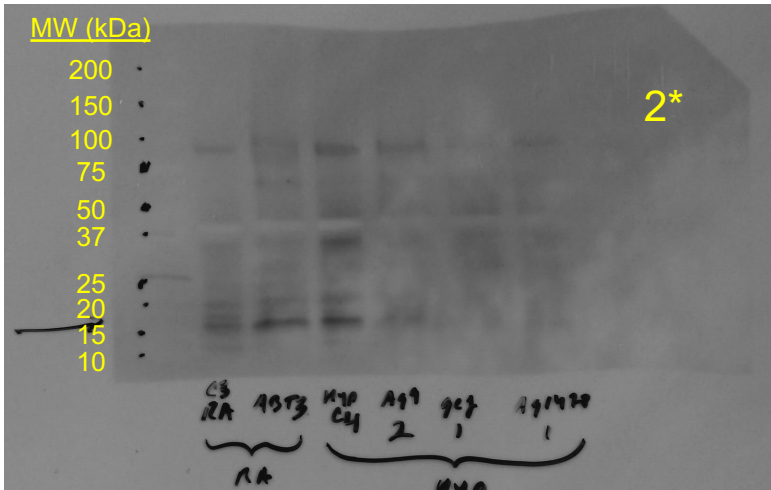

Cleaved caspase-3 (17, 19 kDa)

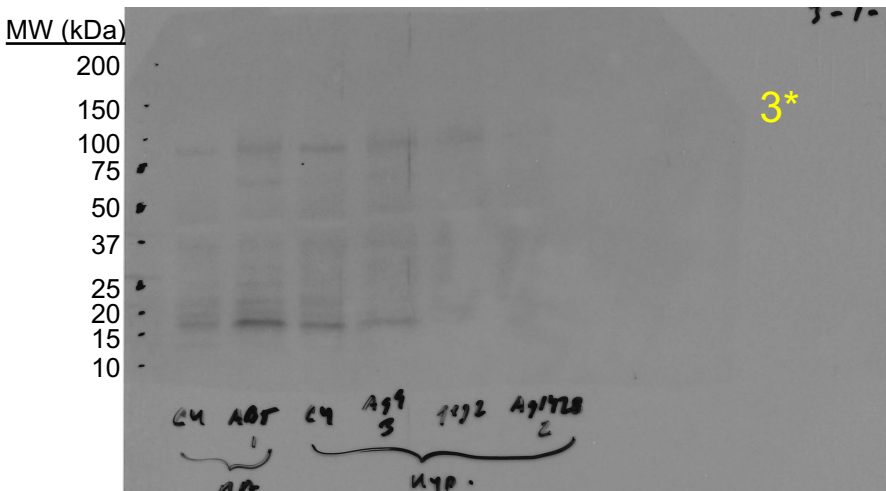

Cleaved caspase-3 (17, 19 kDa)

\*WBs 2 and 3 not shown but included in densitometry

# WBs for Figure 6C

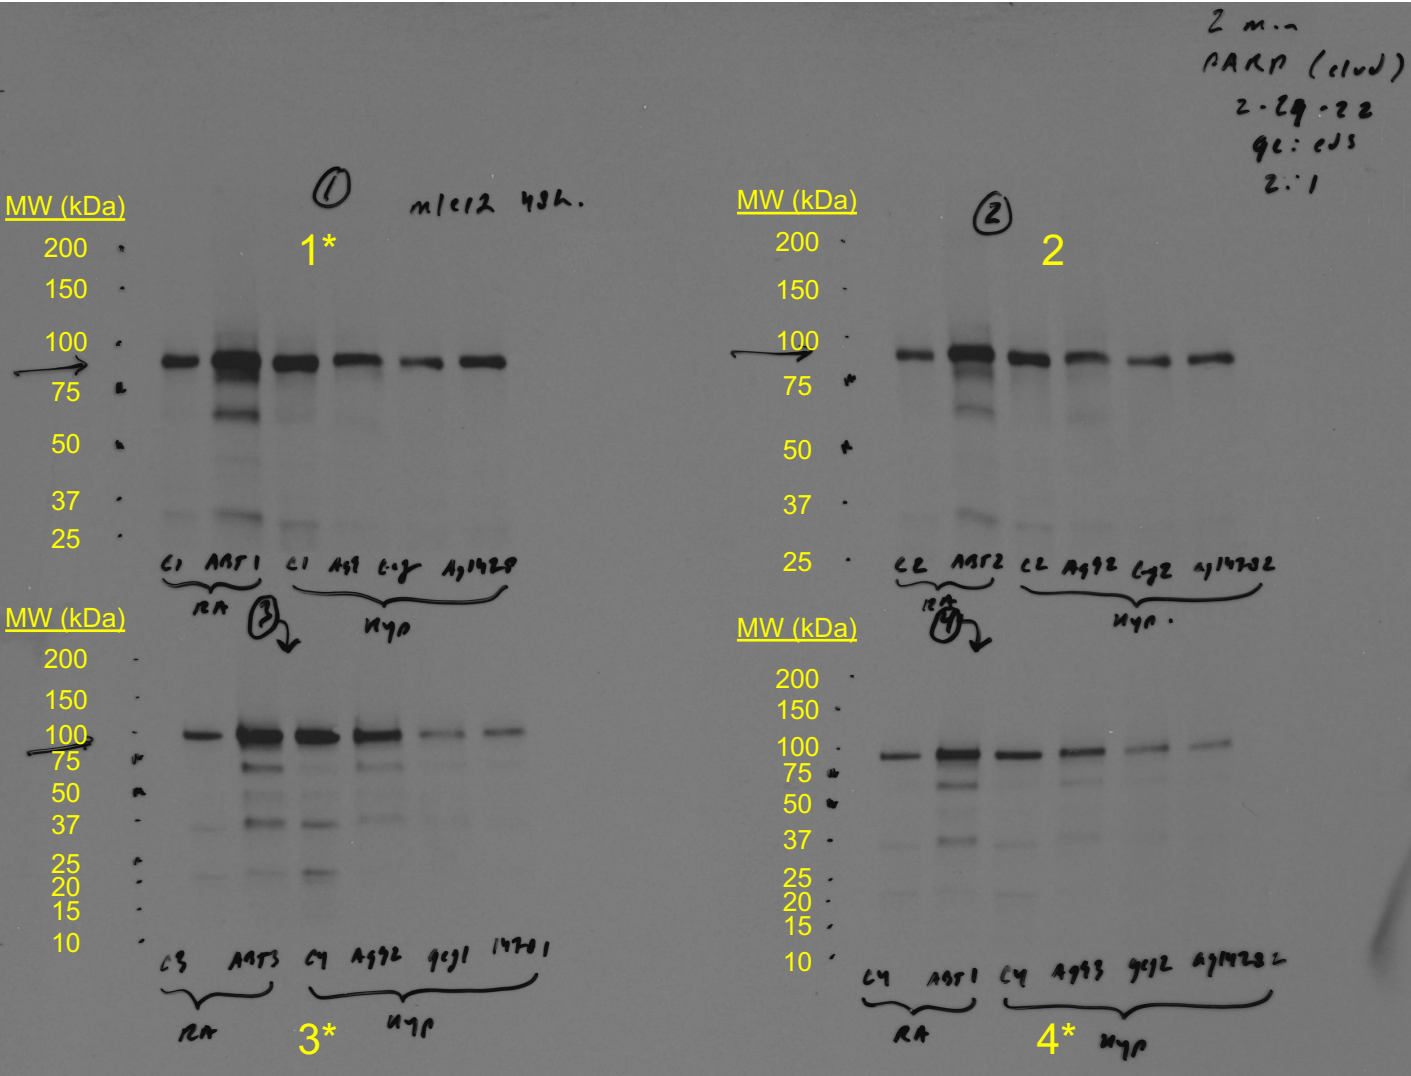

Cleaved PARP (89 kDa)

\*WBs 1, 3, and 4 not shown but included in densitometry

# WBs for Figure 6B

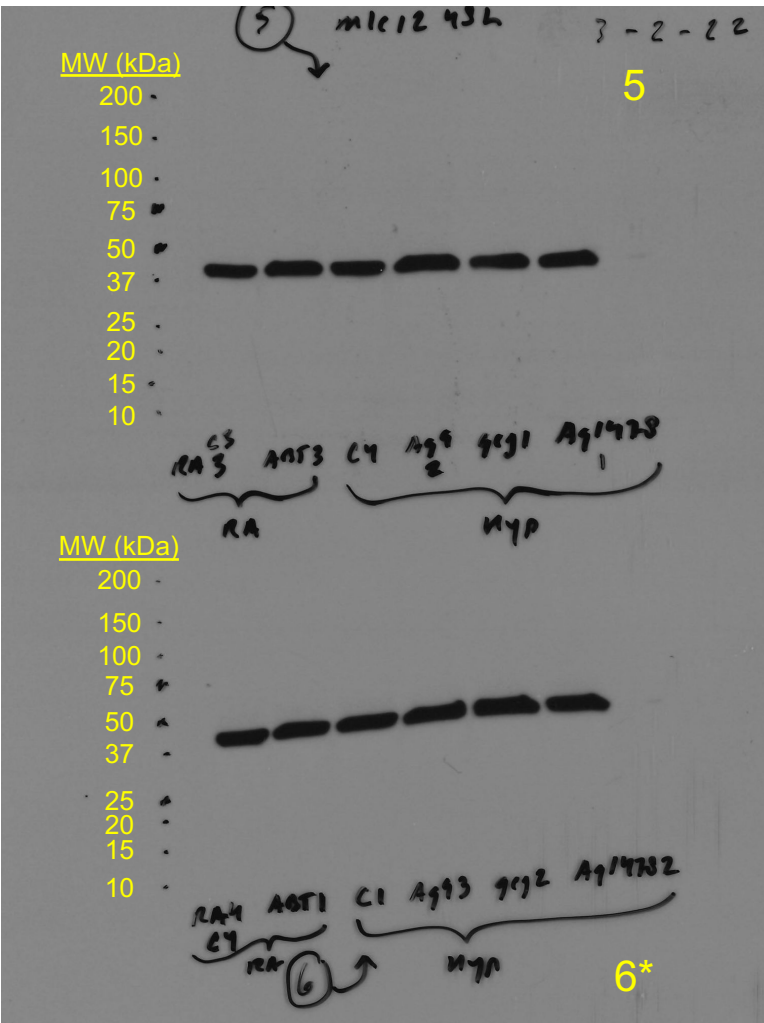

β-Actin (42 kDa)

\*WB 6 not shown but included in densitometry

# WBs for Figure 6B, 6C

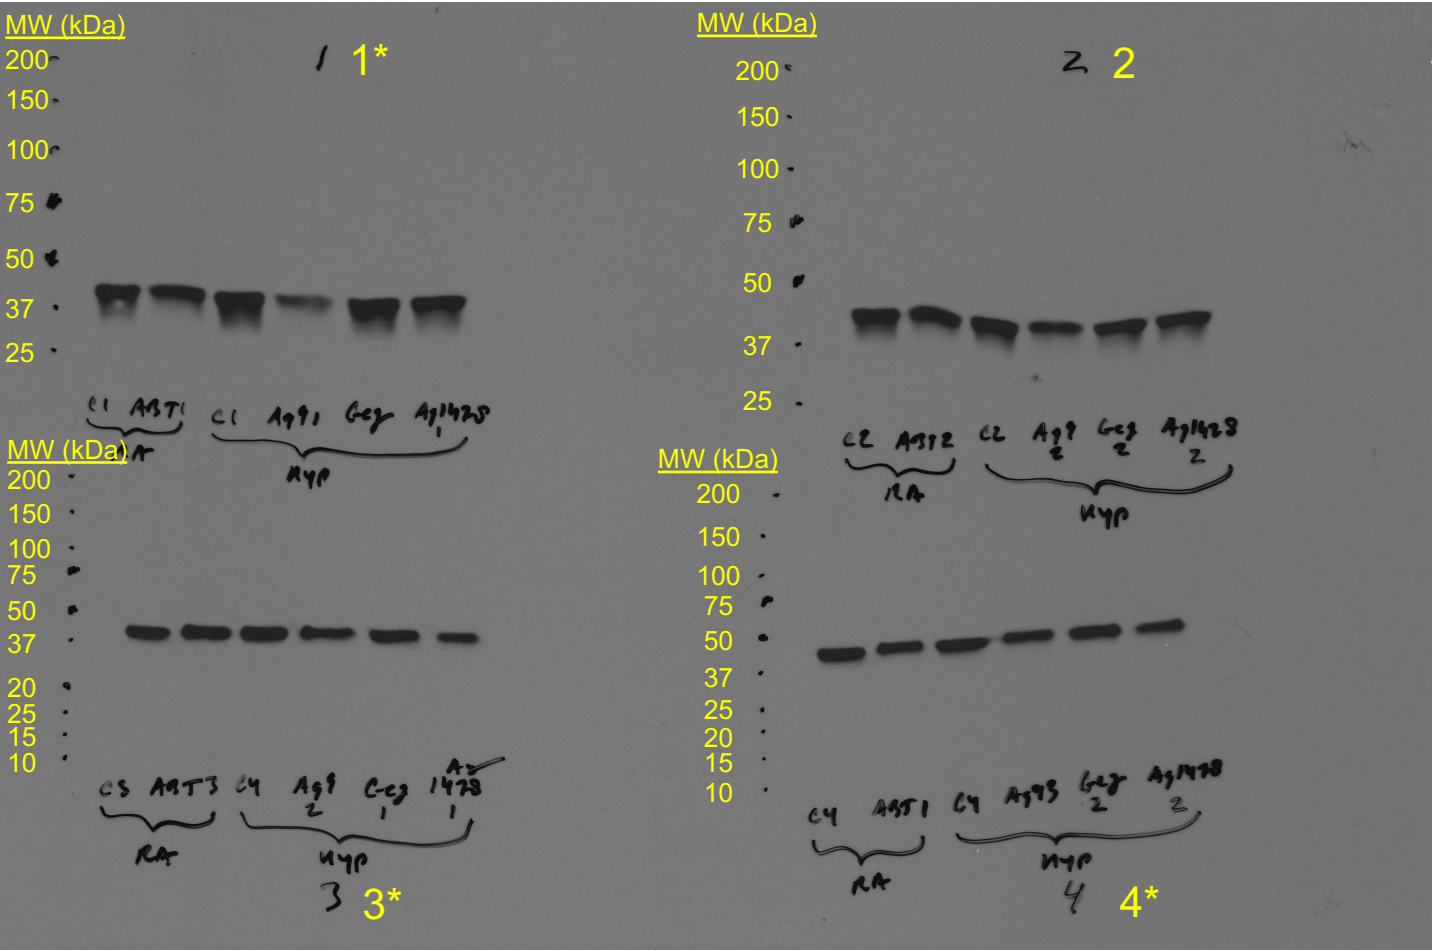

β-Actin (42 kDa)

\*WBs 1, 3, and 4 not shown but included in densitometry

# WBs for Figure 7A

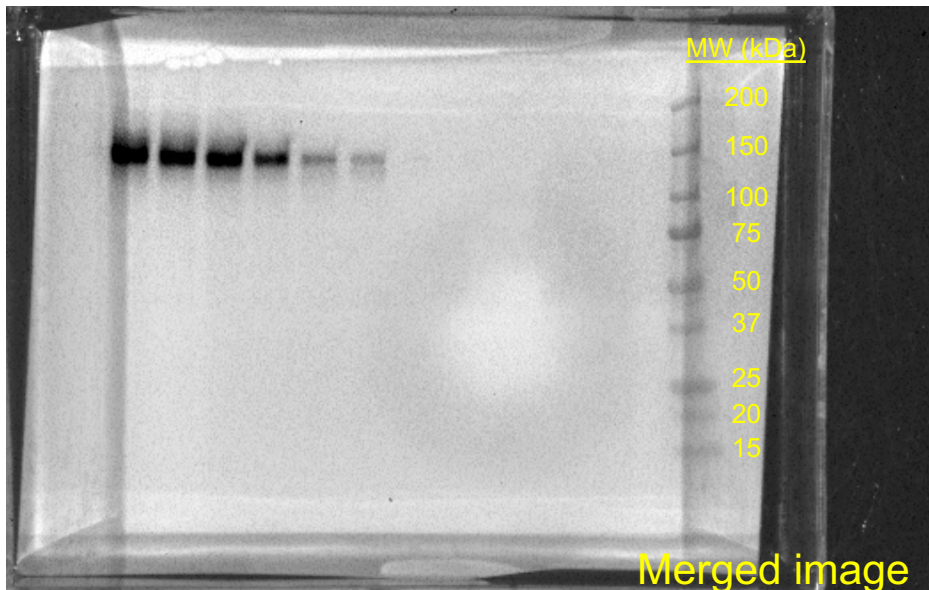

p-EGFR (175 kDa)

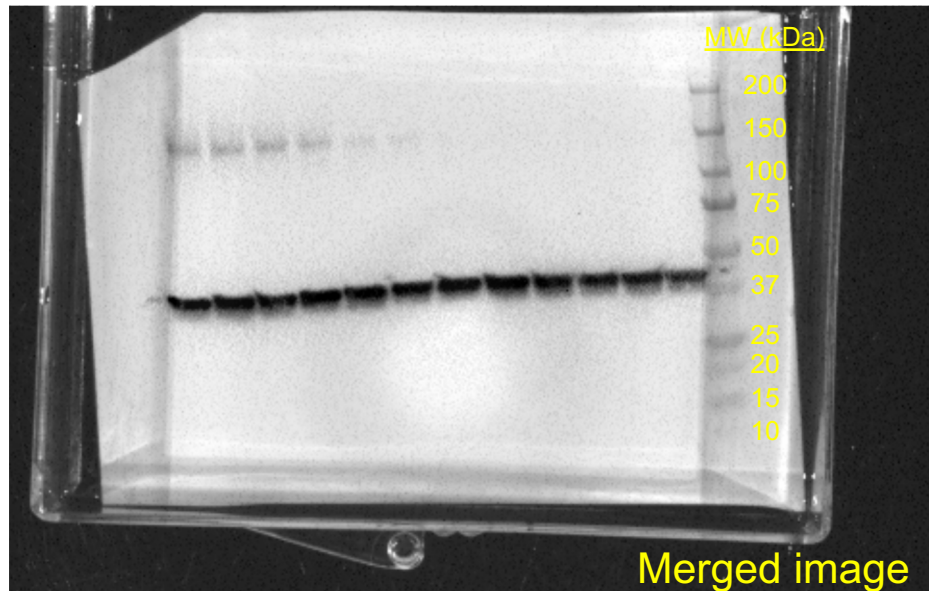

$\beta$ -Actin (42 kDa)

# WBs for Figure 7B

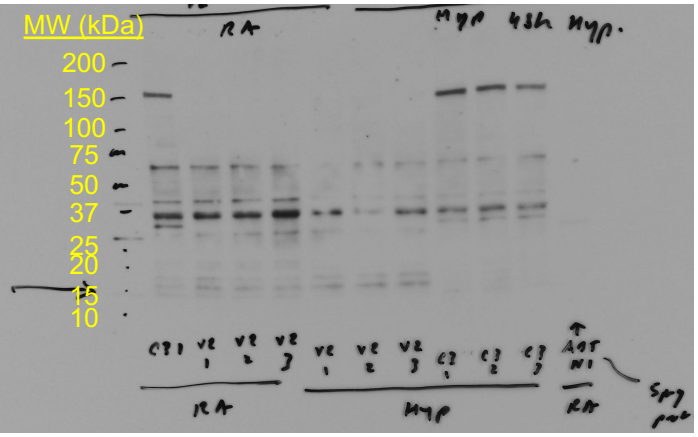

Cleaved caspase-3 (17, 19 kDa)

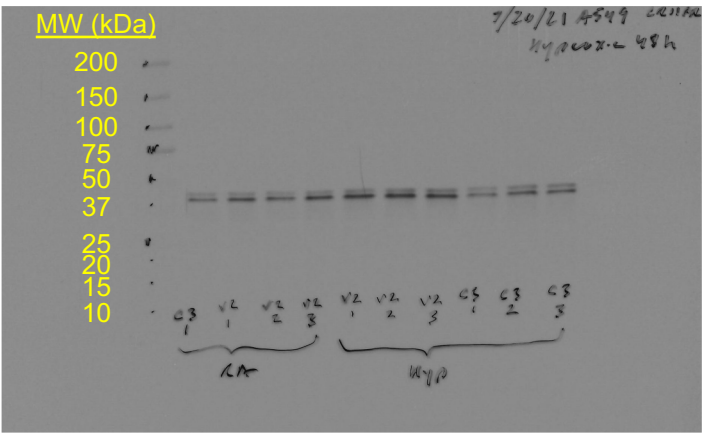

p-ERK1/2 (42, 44 kDa)

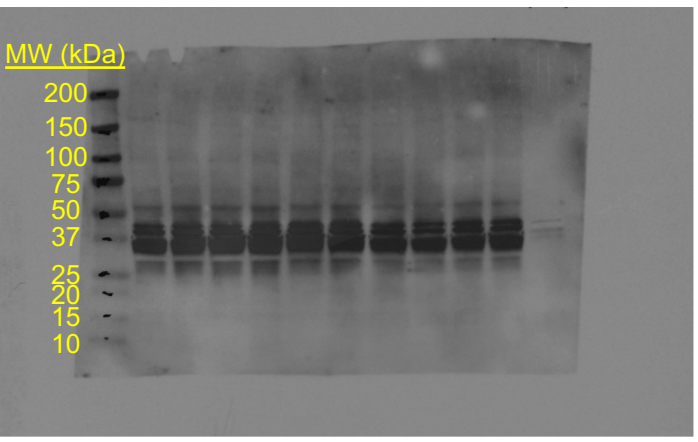

Total ERK1/2 (42, 44 kDa)

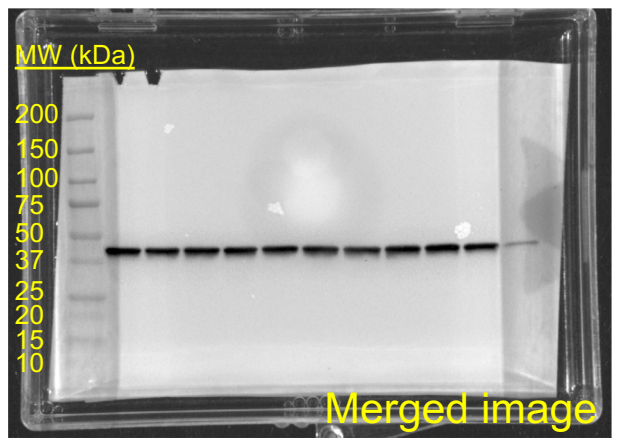

β-Actin (42 kDa)

# WBs for Figure 7C

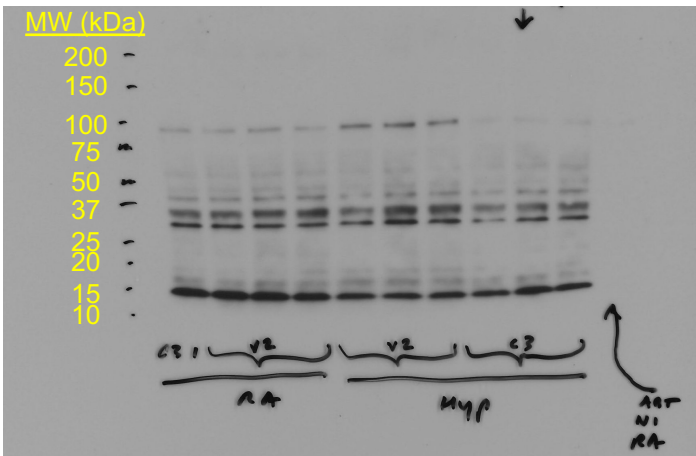

Cleaved PARP (89 kDa)

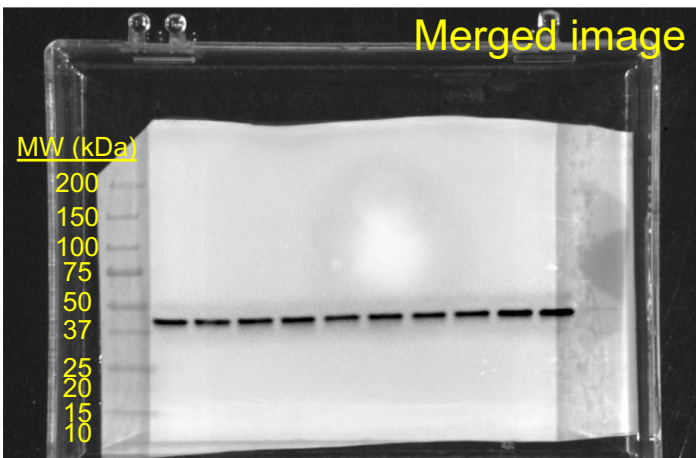

$\beta$ -Actin (42 kDa)

# WBs for Figure S.4

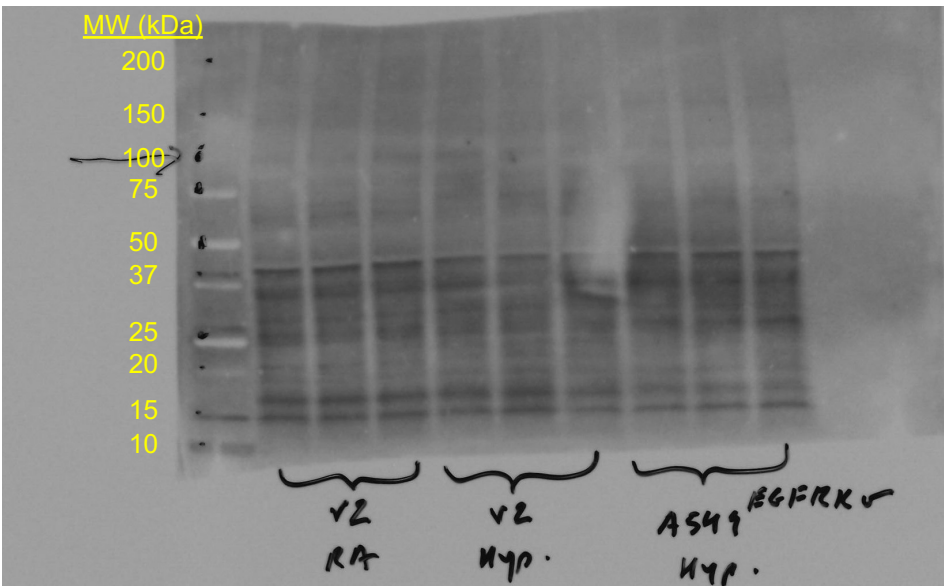

HIF-1α (120 kDa)

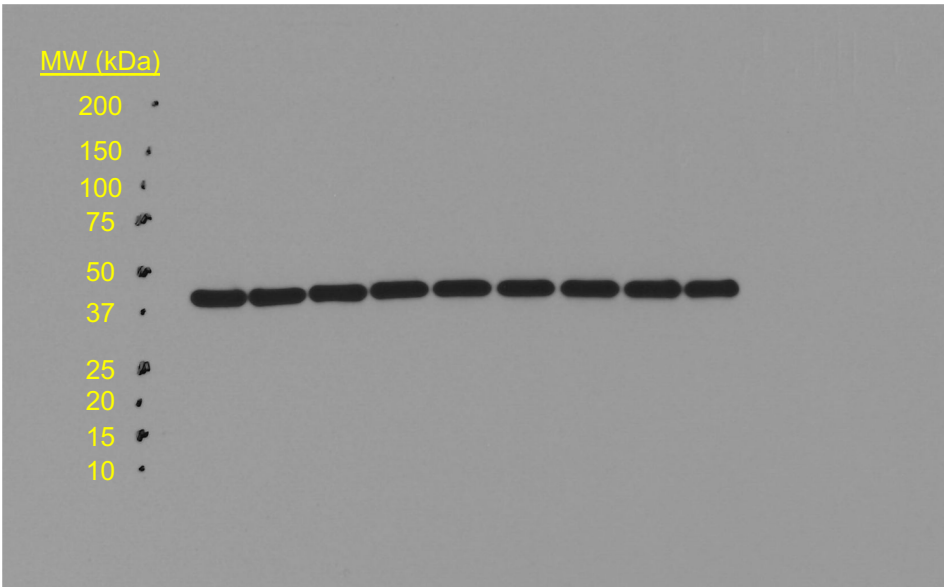

β-Actin (42 kDa)
